# Supplementary material for: Association between peripheral T-Lymphocyte activation and impaired bone mineral density in HIV-infected patients
Source: PubMed Central journal article supplement (PMC3598927; doi:10.1186/1479-5876-11-51), 2013-02-28

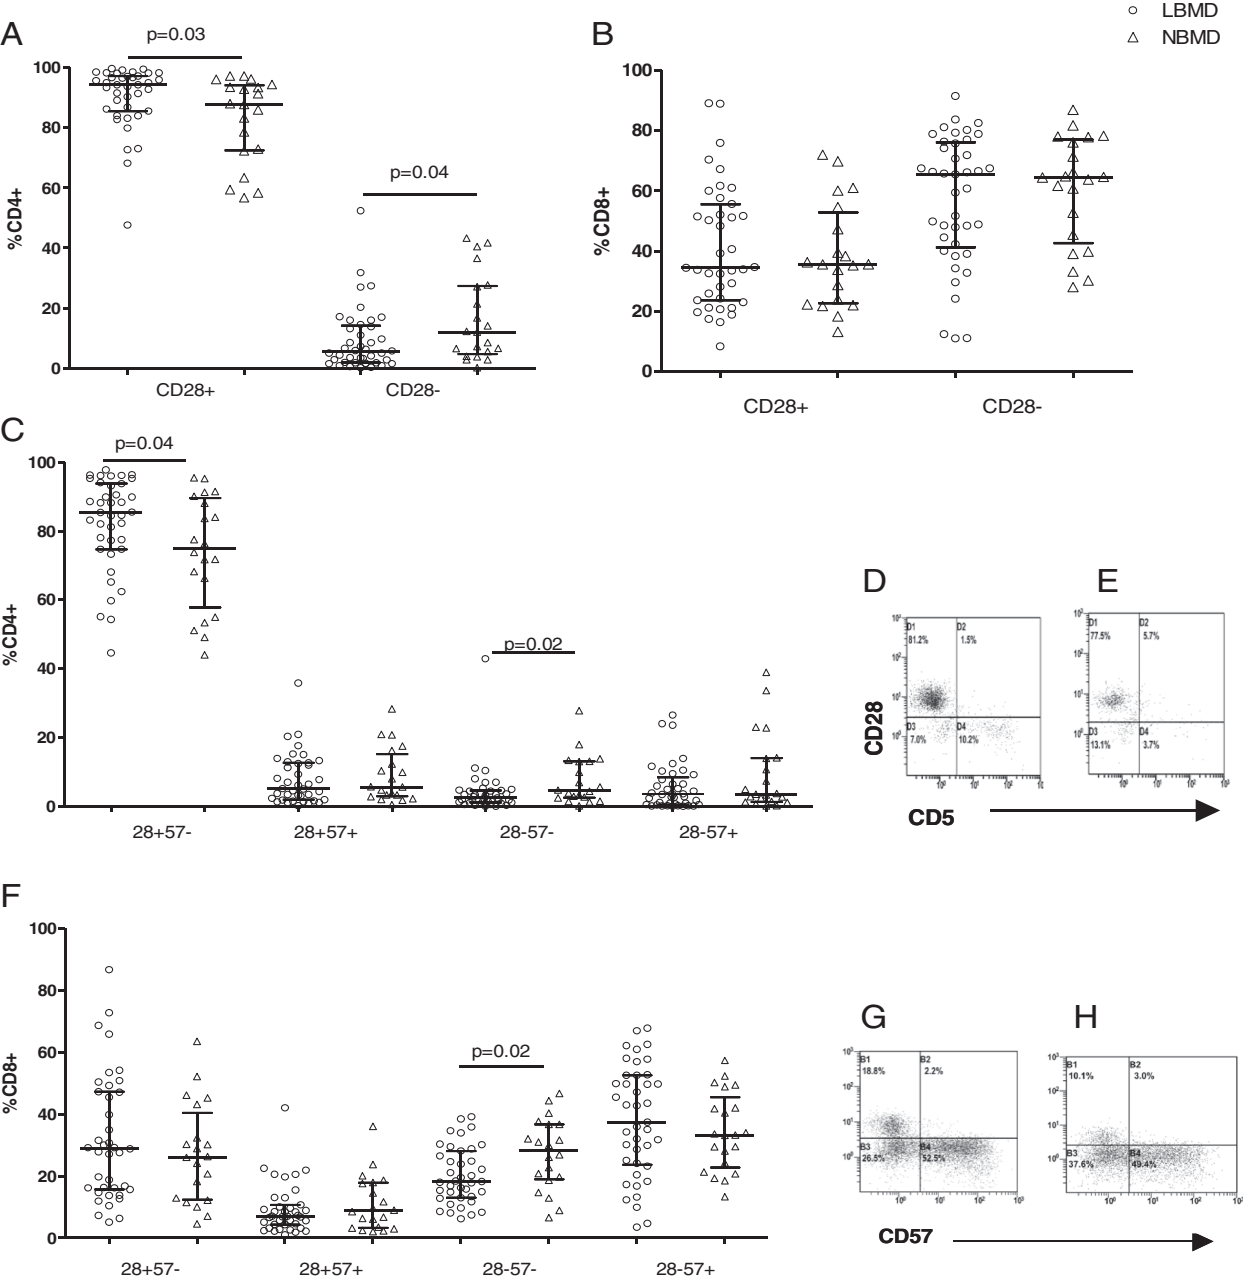

Supplement: 12967_2012_1434_MOESM2_ESM.pdf [file 12967_2012_1434_MOESM2_ESM.pdf]
